# Supplementary material for: Highly photo- and triboluminescent lanthanide(iii) coordination polymers based on diphosphine dioxides containing azaheterocyclic linkers
Source: Royal Society of Chemistry journal article supplement (doi:10.1039/d3nj01119d), 2023-01-01
Supplement: d3nj01119d2.pdf [file d3nj01119d2.pdf]

*Supporting Information*

**Highly photo- and triboluminescent lanthanide(III) coordination polymers  
based on diphosphine dioxides containing azaheterocyclic linkers**

**Yuliya A. Bryleva,\* Vladislav Yu. Komarov, Ludmila A. Glinskaya, Alexander V. Artem'ev,  
Maria P. Davydova, Mariana I. Rakhmanova, Denis G. Samsonenko**

*Nikolaev Institute of Inorganic Chemistry, Siberian Branch of the Russian Academy of Sciences,  
3, Academician Lavrentiev Avenue, Novosibirsk 630090, Russian Federation*

---

\*Corresponding author

E-mail address: [bryleva@niic.nsc.ru](mailto:bryleva@niic.nsc.ru) (Yu. A. Bryleva)

## Contents

|                                                                                                                                                                                  |    |
|----------------------------------------------------------------------------------------------------------------------------------------------------------------------------------|----|
| <b>Table S1.</b> Selected bond lengths and angles for CPs <b>1</b> , <b>4</b> , and <b>6</b> .....                                                                               | 3  |
| <b>Table S2.</b> Selected bond lengths and angles for <b>3</b> .....                                                                                                             | 4  |
| <b>Figure S1.</b> FT-IR spectra of compounds L <sup>1-3</sup> and CPs <b>1-6</b> .....                                                                                           | 6  |
| <b>Figure S2.</b> Projection of the crystal structure of <b>1</b> perpendicular to the polymer chains and view along the polymer chain direction focused on F...F contacts ..... | 7  |
| <b>Figure S3.</b> Projection of the crystal structure of <b>3</b> perpendicular to the polymer chains and view along the polymer chain direction focused on F...F contacts ..... | 8  |
| <b>Figure S4.</b> Projection of the crystal structure of <b>4</b> perpendicular to the polymer chains and view along the polymer chain direction focused on F...F contacts ..... | 9  |
| <b>Figure S5.</b> Projection of the crystal structure of <b>6</b> perpendicular to the polymer chains and view along the polymer chain direction focused on F...F contacts.....  | 10 |
| <b>Figure S6.</b> Simulated XRPD patterns of CPs <b>1</b> , <b>3</b> , <b>4</b> and <b>6</b> , and experimental ones of <b>1-6</b> .....                                         | 11 |
| <b>Figure S7.</b> TG, DTA, and DTG of CPs <b>1-6</b> .....                                                                                                                       | 12 |
| <b>Figure S8.</b> Excitation and emission spectra of L <sup>1</sup> , L <sup>2</sup> , and L <sup>3</sup> in the solid state at 300 K.....                                       | 13 |
| <b>Figure S9.</b> Kinetics of photoluminescence decay of CPs <b>1-6</b> in the solid state at 300 K.....                                                                         | 14 |
| <b>Figure S10.</b> Solid-state emission spectrum of [Gd(hfac) <sub>3</sub> (H <sub>2</sub> O) <sub>2</sub> ] at 77 K .....                                                       | 15 |

**Table S1.** Selected bond lengths and angles for CPs **1**, **4**, and **6**.

| <b>1</b>                  |                  | <b>4</b>                  |                  | <b>6</b>                  |                  |
|---------------------------|------------------|---------------------------|------------------|---------------------------|------------------|
| Bond                      | Bond lengths (Å) | Bond                      | Bond lengths (Å) | Bond                      | Bond lengths (Å) |
| Eu1–O1                    | 2.347 (2)        | Tb1–O1                    | 2.290(2)         | Tb1–O1                    | 2.334(2)         |
| Eu1–O2 <sup>i</sup>       | 2.370(2)         | Tb1–O2                    | 2.309(2)         | Tb1–O2 <sup>i</sup>       | 2.327(2)         |
| Eu1–O1_1                  | 2.399(2)         | Tb1–O1_1                  | 2.374(3)         | Tb1–O1_1                  | 2.384(2)         |
| Eu1–O2_1                  | 2.497(2)         | Tb1–O2_1                  | 2.402(2)         | Tb1–O2_1                  | 2.399(2)         |
| Eu1–O1_2                  | 2.407(2)         | Tb1–O1_2                  | 2.365(3)         | Tb1–O1_2                  | 2.262(16)        |
| Eu1–O2_2                  | 2.463(2)         | Tb1–O2_2                  | 2.413(3)         | Tb1–O2_2                  | 2.276(15)        |
| Eu1–O1_3                  | 2.394(2)         | Tb1–O1_3                  | 2.425(2)         | Tb1–O1_3                  | 2.364(4)         |
| Eu1–O2_3                  | 2.402(2)         | Tb1–O2_3                  | 2.363(3)         | Tb1–O2_3                  | 2.416(4)         |
| Eu1–N2C <sup>i</sup>      | 2.866(2)         |                           |                  | Tb1–O1_4                  | 2.270(11)        |
|                           |                  |                           |                  | Tb1–O2_4                  | 2.350(11)        |
|                           |                  |                           |                  | Tb1–O1_5                  | 2.383(6)         |
|                           |                  |                           |                  | Tb1–O2_5                  | 2.415(6)         |
| P1–O1                     | 1.490(2)         | P1–O1                     | 1.497(2)         | P1–O1                     | 1.492(2)         |
| P1–C1A                    | 1.789(2)         | P1–C1A                    | 1.792(4)         | P1–C1A                    | 1.787(4)         |
| P1–C1B                    | 1.790(2)         | P1–C1B                    | 1.788(4)         | P1–C1B                    | 1.796(4)         |
| P1–C1C                    | 1.824(2)         | P1–C1C                    | 1.837(4)         | P1–C1C                    | 1.821(3)         |
| P2–O2                     | 1.497(2)         | P2–O2                     | 1.501(3)         | P2–O2                     | 1.497(2)         |
| P2–C1D                    | 1.785(3)         | P2–C1D                    | 1.795(4)         | P2–C1D                    | 1.788(4)         |
| P2–C4C                    | 1.820(2)         | P2–C3C                    | 1.832(4)         | P2–C4C                    | 1.823(3)         |
| P2–C1E                    | 1.787(3)         | P2–C1E                    | 1.788(4)         | P2–C1E                    | 1.790(4)         |
|                           |                  |                           |                  |                           |                  |
| Angle                     | Angle size (°)   | Angle                     | Angle size (°)   | Angle                     | Angle size (°)   |
| O1–Eu1–O2 <sup>i</sup>    | 75.97(5)         | O1–Tb1–O2 <sup>i</sup>    | 81.39(9)         | O1–Tb1–O2 <sup>i</sup>    | 145.54(9)        |
| O1–Eu1–O2_2               | 74.56(5)         | O1–Tb1–O2_1               | 75.62(9)         | O1–Tb1–O2_1               | 73.54(9)         |
| O1–Eu1–O1_2               | 143.53(6)        | O1–Tb1–O1_1               | 114.40(9)        | O1–Tb1–O1_1               | 143.13(9)        |
| O1–Eu1–O1_1               | 85.66(5)         | O1–Tb1–O2_2               | 142.38(9)        | O1–Tb1–O2_3               | 78.82(13)        |
| O1–Eu1–O2_1               | 68.52(5)         | O1–Tb1–O1_2               | 146.03(9)        | O1–Tb1–O1_3               | 83.77(11)        |
| O1–Eu1–O1_3               | 90.69(6)         | O1–Tb1–O2_3               | 79.98(9)         | O1–Tb1–O2_4               | 81.4(3)          |
| O1–Eu1–O2_3               | 138.88(5)        | O1–Tb1–O1_3               | 77.14(8)         | O1–Tb1–O1_5               | 70.92(17)        |
| O2 <sup>i</sup> –Eu1–O2_2 | 78.62(5)         | O2 <sup>i</sup> –Tb1–O2_1 | 80.54(8)         | O1–Tb1–O2_5               | 105.73(18)       |
| O2 <sup>i</sup> –Eu1–O1_2 | 92.81(6)         | O2 <sup>i</sup> –Tb1–O1_1 | 142.36(9)        | O2 <sup>i</sup> –Tb1–O2_1 | 140.45(9)        |
| O2 <sup>i</sup> –Eu1–O1_1 | 77.73(5)         | O2 <sup>i</sup> –Tb1–O2_2 | 73.95(9)         | O2 <sup>i</sup> –Tb1–O1_1 | 70.62(9)         |
| O2 <sup>i</sup> –Eu1–O2_1 | 132.06(5)        | O2 <sup>i</sup> –Tb1–O1_2 | 108.62(9)        | O2 <sup>i</sup> –Tb1–O1_3 | 104.10(11)       |
| O2 <sup>i</sup> –Eu1–O1_3 | 145.85(5)        | O2 <sup>i</sup> –Tb1–O2_3 | 148.15(9)        | O2 <sup>i</sup> –Tb1–O2_3 | 72.62(12)        |
| O2 <sup>i</sup> –Eu1–O2_3 | 136.18(5)        | O2 <sup>i</sup> –Tb1–O1_3 | 79.27(8)         | O2 <sup>i</sup> –Tb1–O2_4 | 73.2(3)          |
|                           |                  |                           |                  | O2 <sup>i</sup> –Tb1–O1_5 | 82.41(18)        |
|                           |                  |                           |                  | O2 <sup>i</sup> –Tb1–O2_5 | 84.39(18)        |

i: x-1/2, -y+3/2, z-1/2 (complex **1**)x-1/2, -y+1/2, z-1/2 (complex **4**)-x+3/2, y-1/2, -z+3/2 (complex **6**)

**Table S2.** Selected bond lengths and angles for **3**

| 3                           |                  |                 |                  |                        |                  |                 |                  |                             |                  |                 |                  |
|-----------------------------|------------------|-----------------|------------------|------------------------|------------------|-----------------|------------------|-----------------------------|------------------|-----------------|------------------|
| Bond                        | Bond lengths (Å) | Bond            | Bond lengths (Å) | Bond                   | Bond lengths (Å) | Bond            | Bond lengths (Å) | Bond                        | Bond lengths (Å) | Bond            | Bond lengths (Å) |
| Eu11–O1_2 <sup>i</sup>      | 2.353(5)         | Eu12–O1_1       | 2.353(5)         | Eu21–O1_3              | 2.344(6)         | Eu22–O2_3       | 2.345(5)         | Eu31–O2_5                   | 2.367(6)         | Eu32–O1_5       | 2.356(6)         |
| Eu11–O2_1                   | 2.329(5)         | Eu12–O2_2       | 2.342(5)         | Eu21–O2_4 <sup>i</sup> | 2.353(5)         | Eu22–O1_4       | 2.387(5)         | Eu31–O1_6 <sup>i</sup>      | 2.372(6)         | Eu32–O2_6       | 2.339(5)         |
| Eu11–O1_20                  | 2.420(5)         | Eu12–O1_23      | 2.492(5)         | Eu21–O1_26             | 2.458(5)         | Eu22–O1_29      | 2.49(3)          | Eu31–O1_32                  | 2.408(6)         | Eu32–O1_35      | 2.421(7)         |
| Eu11–O2_20                  | 2.429(5)         | Eu12–O2_23      | 2.409(5)         | Eu21–O2_26             | 2.429(6)         | Eu22–O2_29      | 2.43(2)          | Eu31–O2_32                  | 2.461(6)         | Eu32–O2_35      | 2.476(6)         |
| Eu11–O1_21                  | 2.427(5)         | Eu12–O1_24      | 2.389(5)         | Eu21–O1_27             | 2.435(6)         | Eu22–O1_30      | 2.464(5)         | Eu31–O1_33                  | 2.408(6)         | Eu32–O1_36      | 2.388(6)         |
| Eu11–O2_21                  | 2.475(5)         | Eu12–O2_24      | 2.415(5)         | Eu21–O2_27             | 2.389(6)         | Eu22–O2_30      | 2.381(5)         | Eu31–O2_33                  | 2.471(6)         | Eu32–O2_36      | 2.417(6)         |
| Eu11–O1_22                  | 2.489(5)         | Eu12–O1_25      | 2.408(5)         | Eu21–O1_28             | 2.415(6)         | Eu22–O1_31      | 2.39(2)          | Eu31–O1_34                  | 2.388(6)         | Eu32–O1_37      | 2.414(6)         |
| Eu11–O2_22                  | 2.374(5)         | Eu12–O2_25      | 2.465(5)         | Eu21–O2_28             | 2.453(6)         | Eu22–O2_31      | 2.42(4)          | Eu31–O2_34                  | 2.434(5)         | Eu32–O2_37      | 2.458(6)         |
| Eu11–N1_2 <sup>i</sup>      | 2.943(5)         | Eu12–N1_1       | 2.863(6)         | Eu21–N1_3              | 2.845(7)         | Eu22–N1_4       | 2.953(6)         | Eu31–N1_6 <sup>i</sup>      | 2.925(6)         | Eu32–N1_5       | 2.874(7)         |
| P1_1–O1_1                   | 1.499(5)         | P1_2–O1_2       | 1.496(5)         | P1_3–O1_3              | 1.489(6)         | P1_4–O1_4       | 1.492(5)         | P1_5–O1_5                   | 1.492(6)         | P1_6–O1_6       | 1.496(6)         |
| P1_1–C1A_1                  | 1.792(8)         | P1_2–C1A_2      | 1.784(7)         | P1_3–C1A_3             | 1.785(8)         | P1_4–C1A_4      | 1.784(8)         | P1_5–C1B_5                  | 1.786(8)         | P1_6–C1A_6      | 1.791(9)         |
| P1_1–C1B_1                  | 1.784(7)         | P1_2–C1B_2      | 1.789(7)         | P1_3–C1B_3             | 1.766(9)         | P1_4–C1B_4      | 1.792(8)         | P1_5–C1C_5                  | 1.826(8)         | P1_6–C1B_6      | 1.782(9)         |
| P1_1–C1C_1                  | 1.830(7)         | P1_2–C1C_2      | 1.841(7)         | P1_3–C1C_3             | 1.834(8)         | P1_4–C1C_4      | 1.836(8)         | P1_5–C4_5                   | 1.783(9)         | P1_6–C1C_6      | 1.820(8)         |
| P2_1–O2_1                   | 1.495(5)         | P2_2–O2_2       | 1.498(5)         | P3_3–O2_3              | 1.483(5)         | P2_4–O2_4       | 1.485(6)         | P2_5–O2_5                   | 1.497(6)         | P2_6–O2_6       | 1.485(6)         |
| P2_1–C1D_1                  | 1.794(8)         | P2_2–C1D_2      | 1.776(8)         | P3_3–C1D_3             | 1.76(3)          | P2_4–C1D_4      | 1.790(8)         | P2_5–C1D_5                  | 1.764(9)         | P2_6–C1D_6      | 1.785(9)         |
| P2_1–C1E_1                  | 1.776(8)         | P2_2–C1E_2      | 1.803(7)         | P3_3–C1E_3             | 1.82(4)          | P2_4–C1E_4      | 1.803(8)         | P2_5–C1E_5                  | 1.800(8)         | P2_6–C1E_6      | 1.768(10)        |
| P2_1–C3C_1                  | 1.817(7)         | P2_2–C3C_2      | 1.829(7)         | P3_3–C3C_3             | 1.822(7)         | P2_4–C3C_4      | 1.809(8)         | P2_5–C3C_5                  | 1.817(8)         | P2_6–C3C_6      | 1.814(8)         |
|                             |                  |                 |                  |                        |                  |                 |                  |                             |                  |                 |                  |
| Angle                       | Angle size (°)   | Angle           | Angle size (°)   | Angle                  | Angle size (°)   | Angle           | Angle size (°)   | Angle                       | Angle size (°)   | Angle           | Angle size (°)   |
| O2_1–Eu11–N1_2 <sup>i</sup> | 129.4(2)         | O1_1–Eu12–N1_1  | 63.9(2)          | O1_3–Eu21–N1_3         | 64.0(2)          | O2_3–Eu22–N1_4  | 127.1(2)         | O2_5–Eu31–N1_6 <sup>i</sup> | 127.0(2)         | O1_5–Eu32–N1_5  | 63.9(2)          |
| O2_1–Eu11–O1_2 <sup>i</sup> | 74.0(2)          | O1_1–Eu12–O1_23 | 72.1(2)          | O1_3–Eu21–O1_26        | 73.6(2)          | O2_3–Eu22–O1_4  | 74.6(2)          | O2_5–Eu31–O1_32             | 77.2(2)          | O1_5–Eu32–O1_35 | 90.4(2)          |
| O2_1–Eu11–O1_20             | 140.5(2)         | O1_1–Eu12–O2_23 | 88.8(2)          | O1_3–Eu21–O2_26        | 92.5(2)          | O2_3–Eu22–O1_29 | 106.3(6)         | O2_5–Eu31–O2_32             | 67.9(2)          | O1_5–Eu32–O2_35 | 73.0(2)          |
| O2_1–Eu11–O2_20             | 85.5(2)          | O1_1–Eu12–O1_24 | 134.5(2)         | O1_3–Eu21–O1_27        | 145.4(2)         | O2_3–Eu22–O2_29 | 139.9(5)         | O2_5–Eu31–O1_33             | 137.0(2)         | O1_5–Eu32–O1_36 | 134.5(2)         |
| O2_1–Eu11–O1_21             | 102.0(2)         | O1_1–Eu12–O2_24 | 143.0(2)         | O1_3–Eu21–O2_27        | 134.7(2)         | O2_3–Eu22–O1_30 | 71.6(2)          | O2_5–Eu31–O2_33             | 109.3(2)         | O1_5–Eu32–O2_36 | 143.9(2)         |

|                     |          |                     |          |                                   |          |                     |          |                                   |          |                     |          |
|---------------------|----------|---------------------|----------|-----------------------------------|----------|---------------------|----------|-----------------------------------|----------|---------------------|----------|
| O2_1-Eu11-<br>O2_21 | 68.5(2)  | O1_1-Eu12-<br>O1_25 | 79.5(2)  | O1_3-Eu21-<br>O1_28               | 76.0(2)  | O2_3-Eu22-<br>O2_30 | 138.9(2) | O2_5-Eu31-<br>O1_34               | 137.8(2) | O1_5-Eu32-<br>O1_37 | 75.8(2)  |
| O2_1-Eu11-<br>O1_22 | 70.8(2)  | O1_1-Eu12-<br>O2_25 | 133.9(2) | O1_3-Eu21-<br>O2_28               | 131.7(2) | O2_3-Eu22-<br>O1_31 | 70.1(5)  | O2_5-Eu31-<br>O2_34               | 70.8(2)  | O1_5-Eu32-<br>O2_37 | 131.7(2) |
| O2_1-Eu11-<br>O2_22 | 138.2(2) | O2_2-Eu12-<br>O1_1  | 75.6(2)  | O2_4 <sup>i</sup> -Eu21-<br>O1_26 | 70.6(2)  | O2_3-Eu22-<br>O2_31 | 77.1(8)  | O1_6 <sup>i</sup> -Eu31-<br>O1_32 | 80.6(2)  | O2_6-Eu32-<br>O1_5  | 76.5(2)  |

i: x, y-1, z

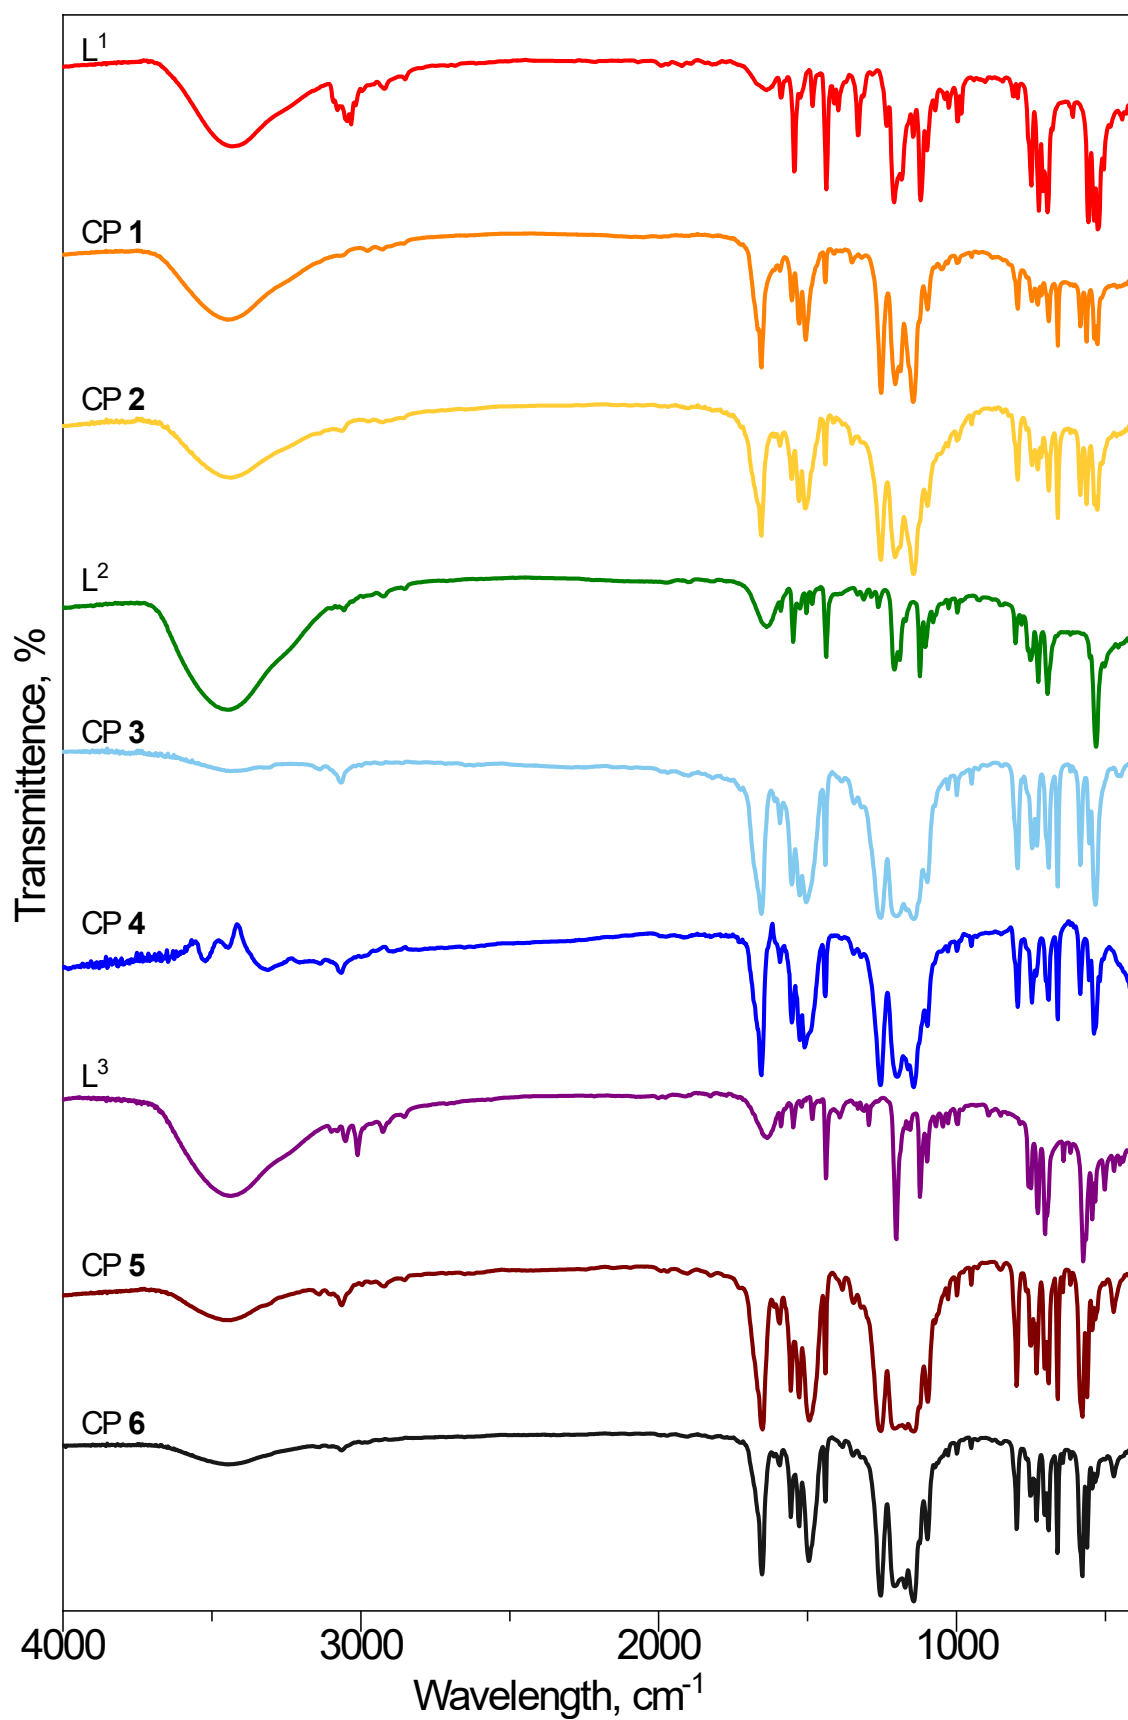

**Figure S1.** FT-IR spectra of compounds L<sup>1-3</sup> and CPs 1-6.

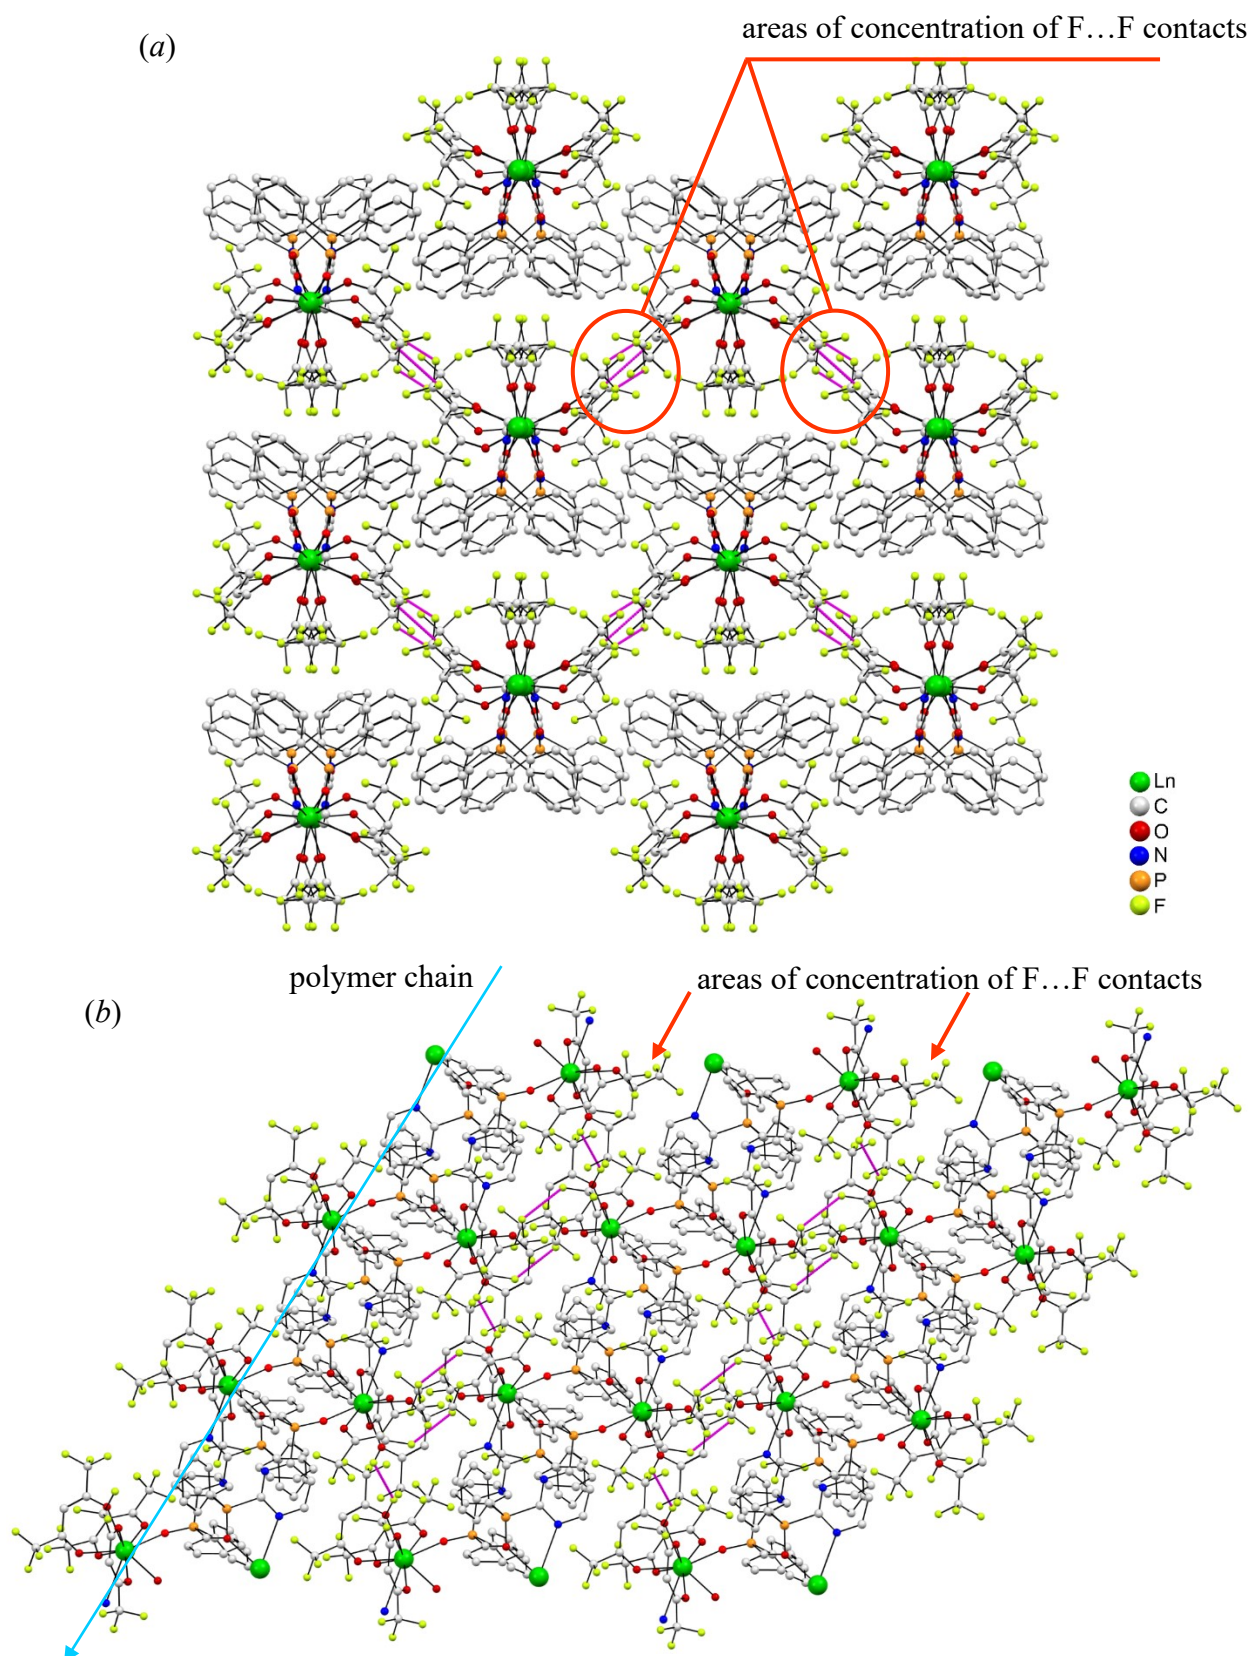

**Figure S2.** (a) Projection of the crystal structure of **1** perpendicular to the polymer chains and (b) view along the polymer chains (along the [010] direction) focused on F...F contacts (magenta). H atoms and disordered atom positions are omitted for clarity.

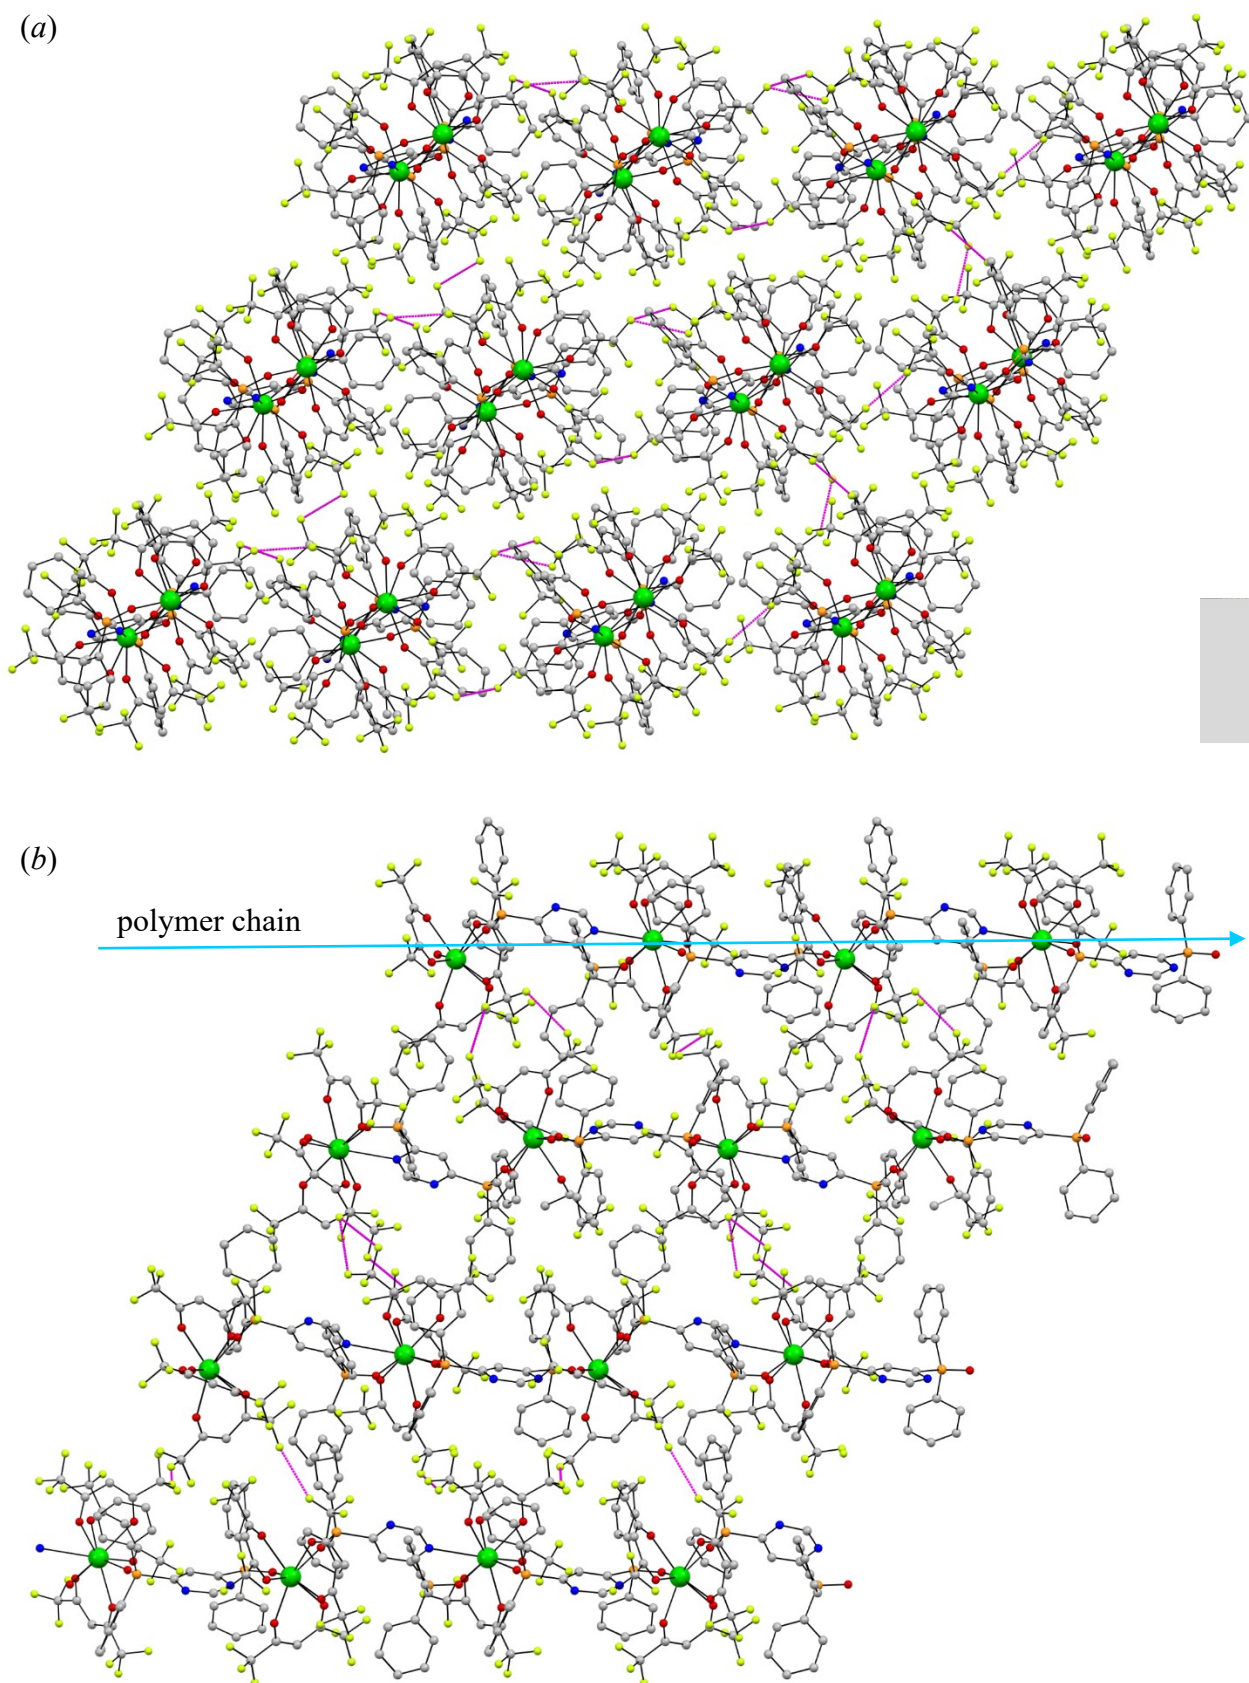

**Figure S3.** (a) Projection of the crystal structure of **3** perpendicular to the polymer chains (along the [010] direction) and (b) view along the polymer chain direction (along the [100] direction) focused on F...F contacts (magenta). H atoms and disordered atom positions are omitted for clarity.



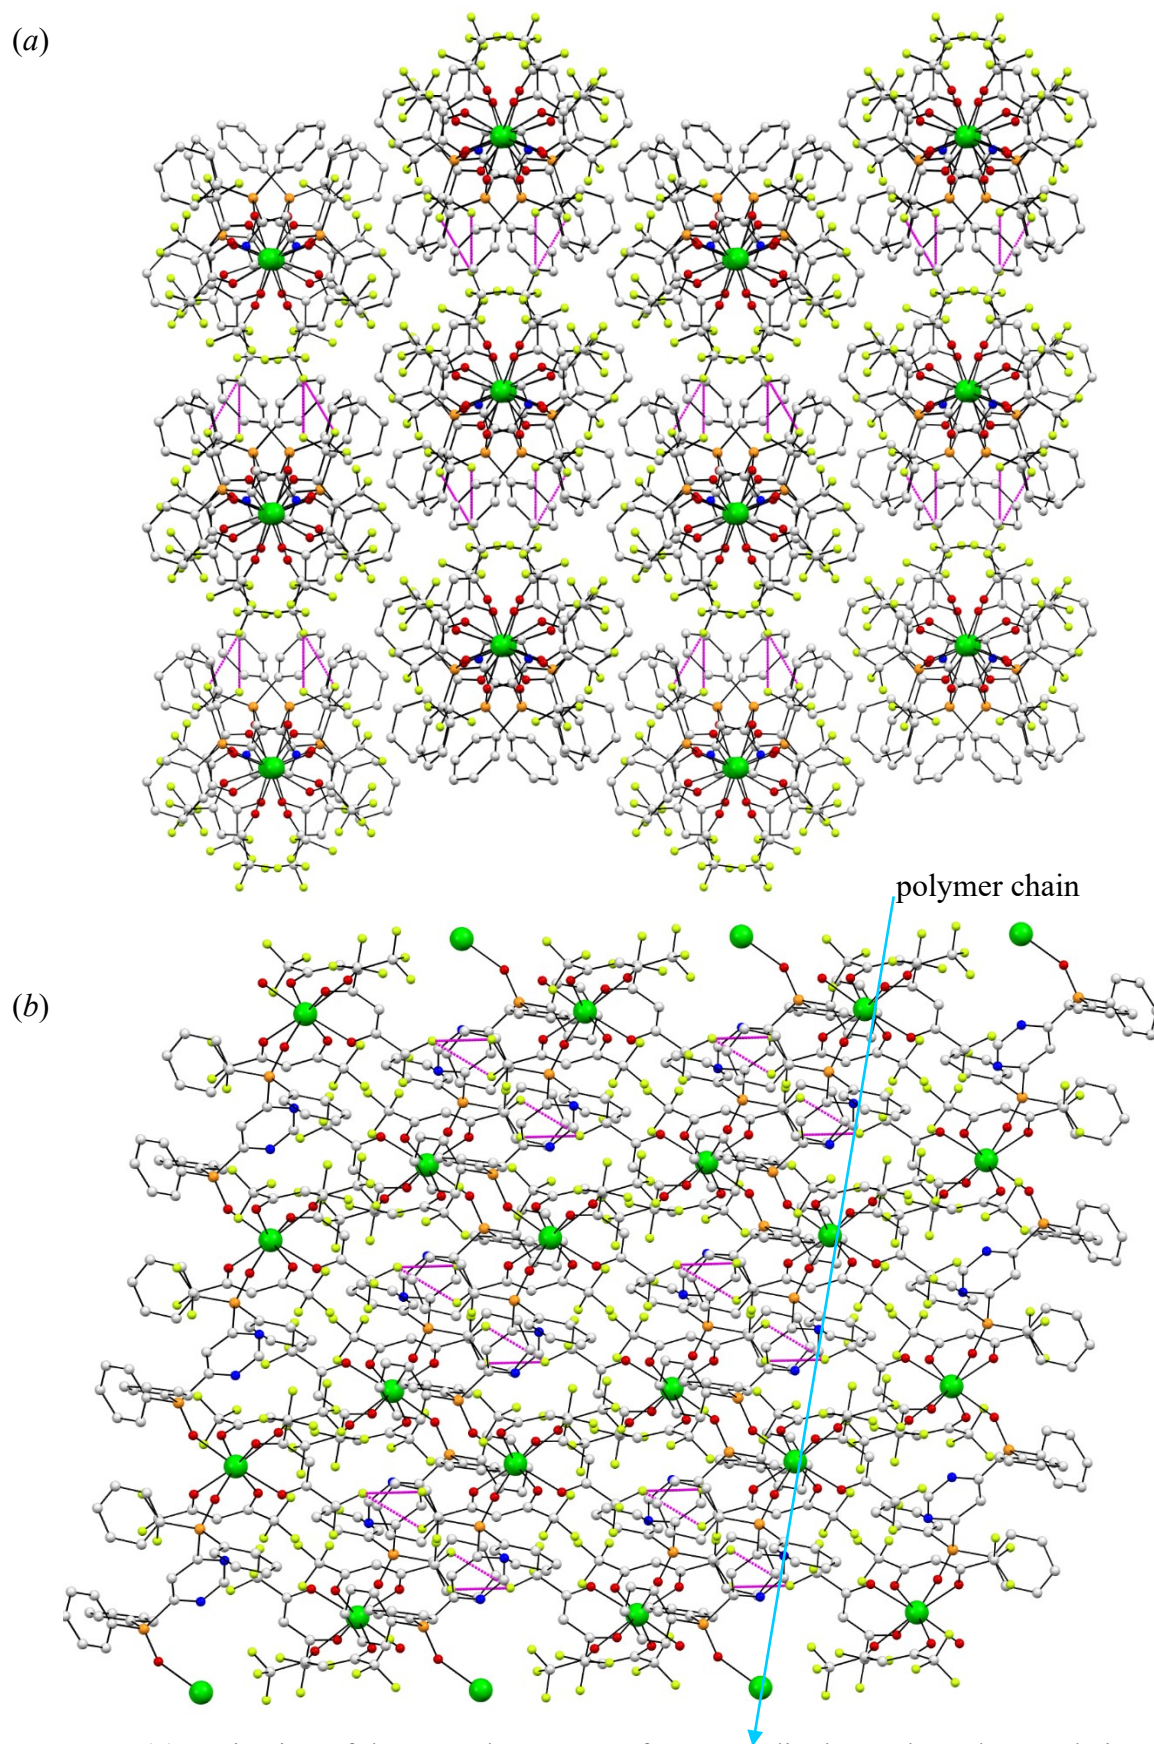

**Figure S4.** (a) Projection of the crystal structure of **4** perpendicular to the polymer chains and (b) view along the polymer chain direction (along the [010] direction) focused on F...F contacts (magenta). H atoms and disordered atom positions are omitted for clarity.

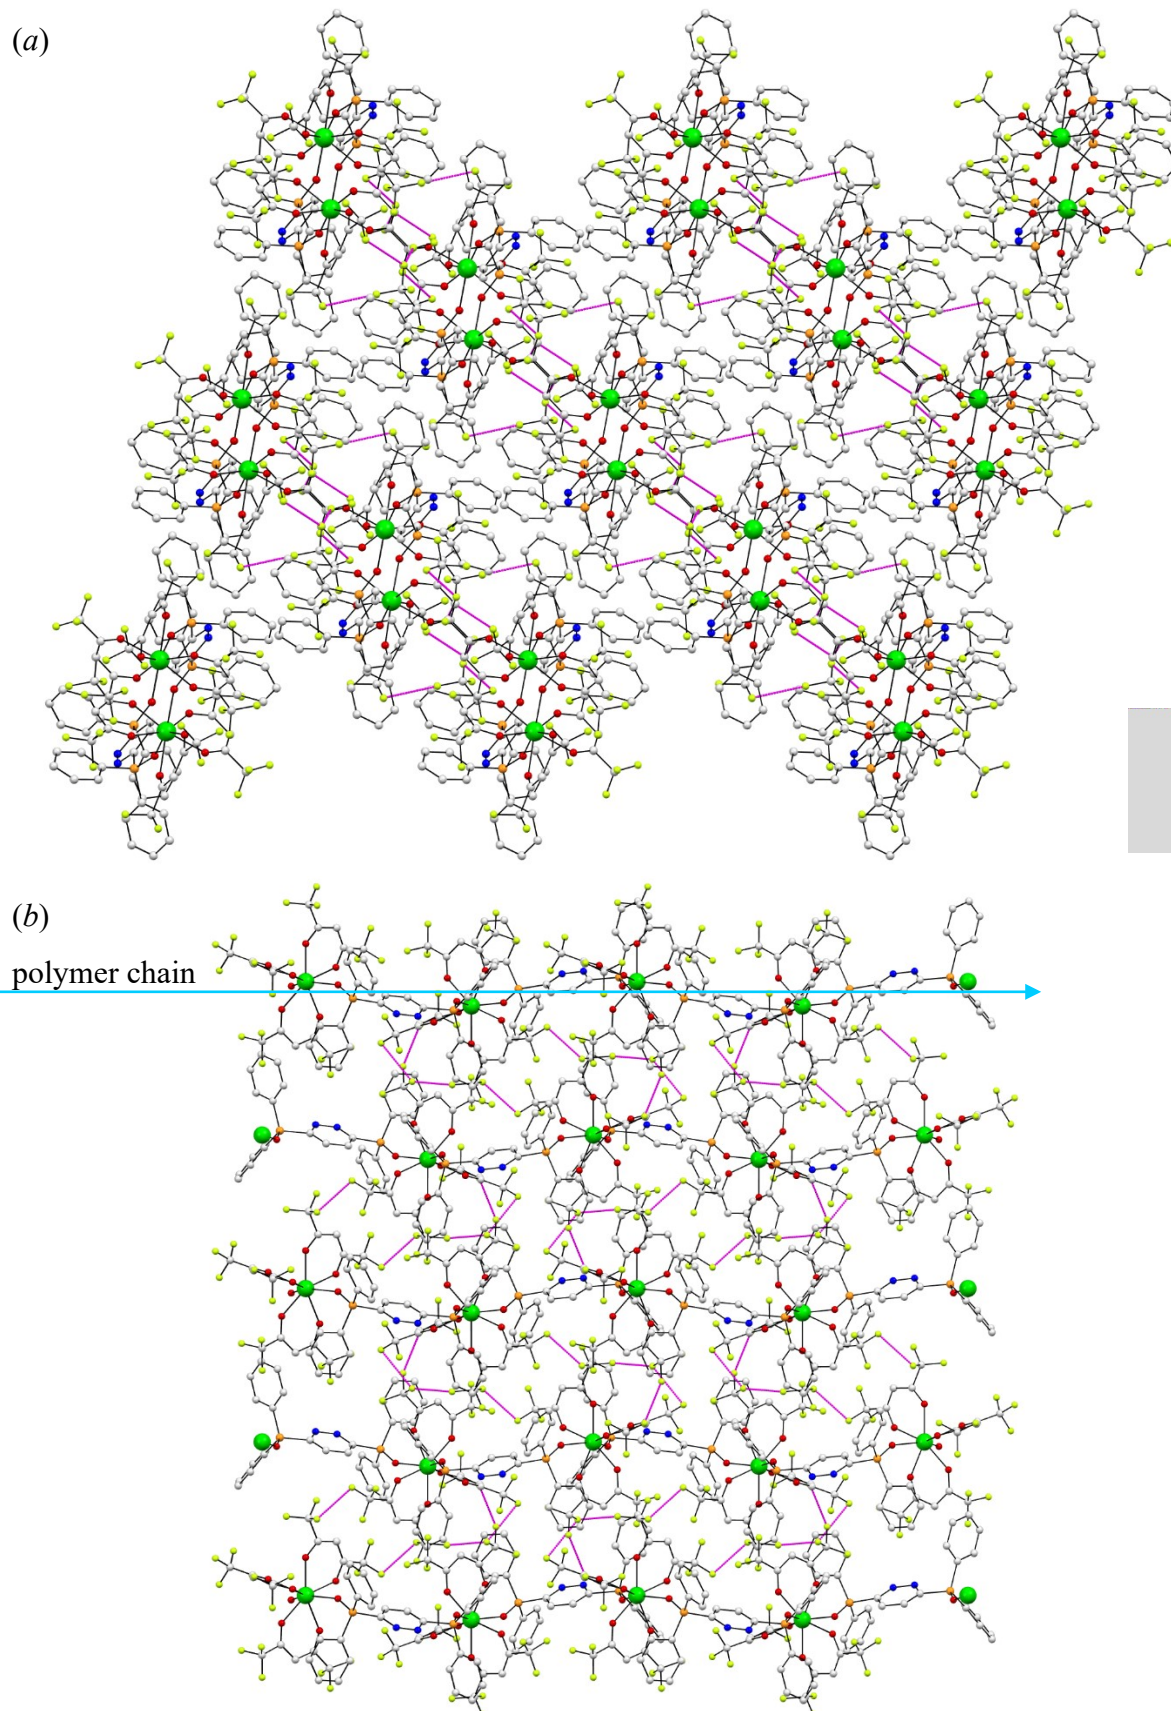

**Figure S5.** (a) Projection of the crystal structure of **6** perpendicular to the polymer chains (along the [010] direction) and (b) view along the polymer chain direction (along the [100] direction) focused on F...F contacts (magenta). H atoms and disordered atom positions are omitted for clarity.

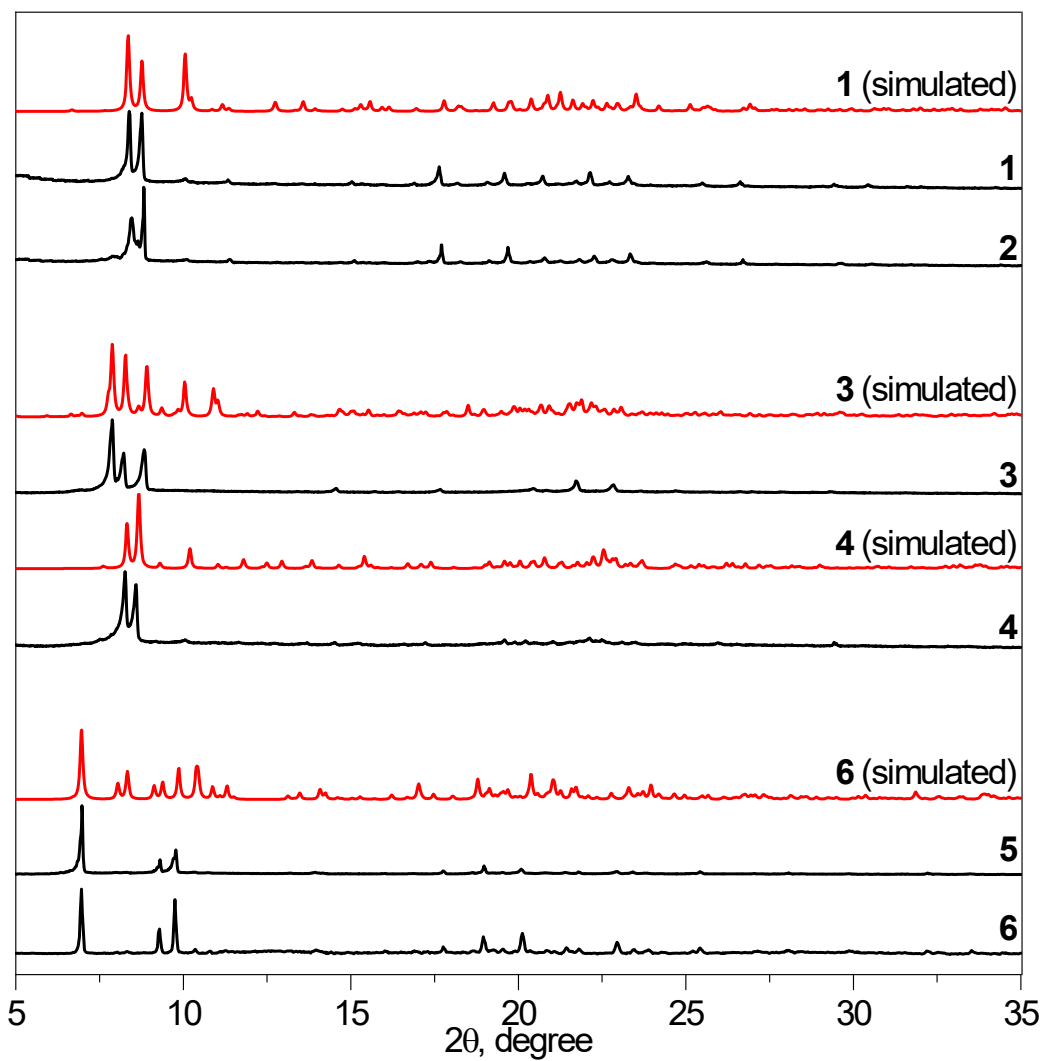

**Figure S6.** Simulated XRPD patterns of CPs **1**, **3**, **4** and **6** (red), and experimental ones of **1–6** (black).

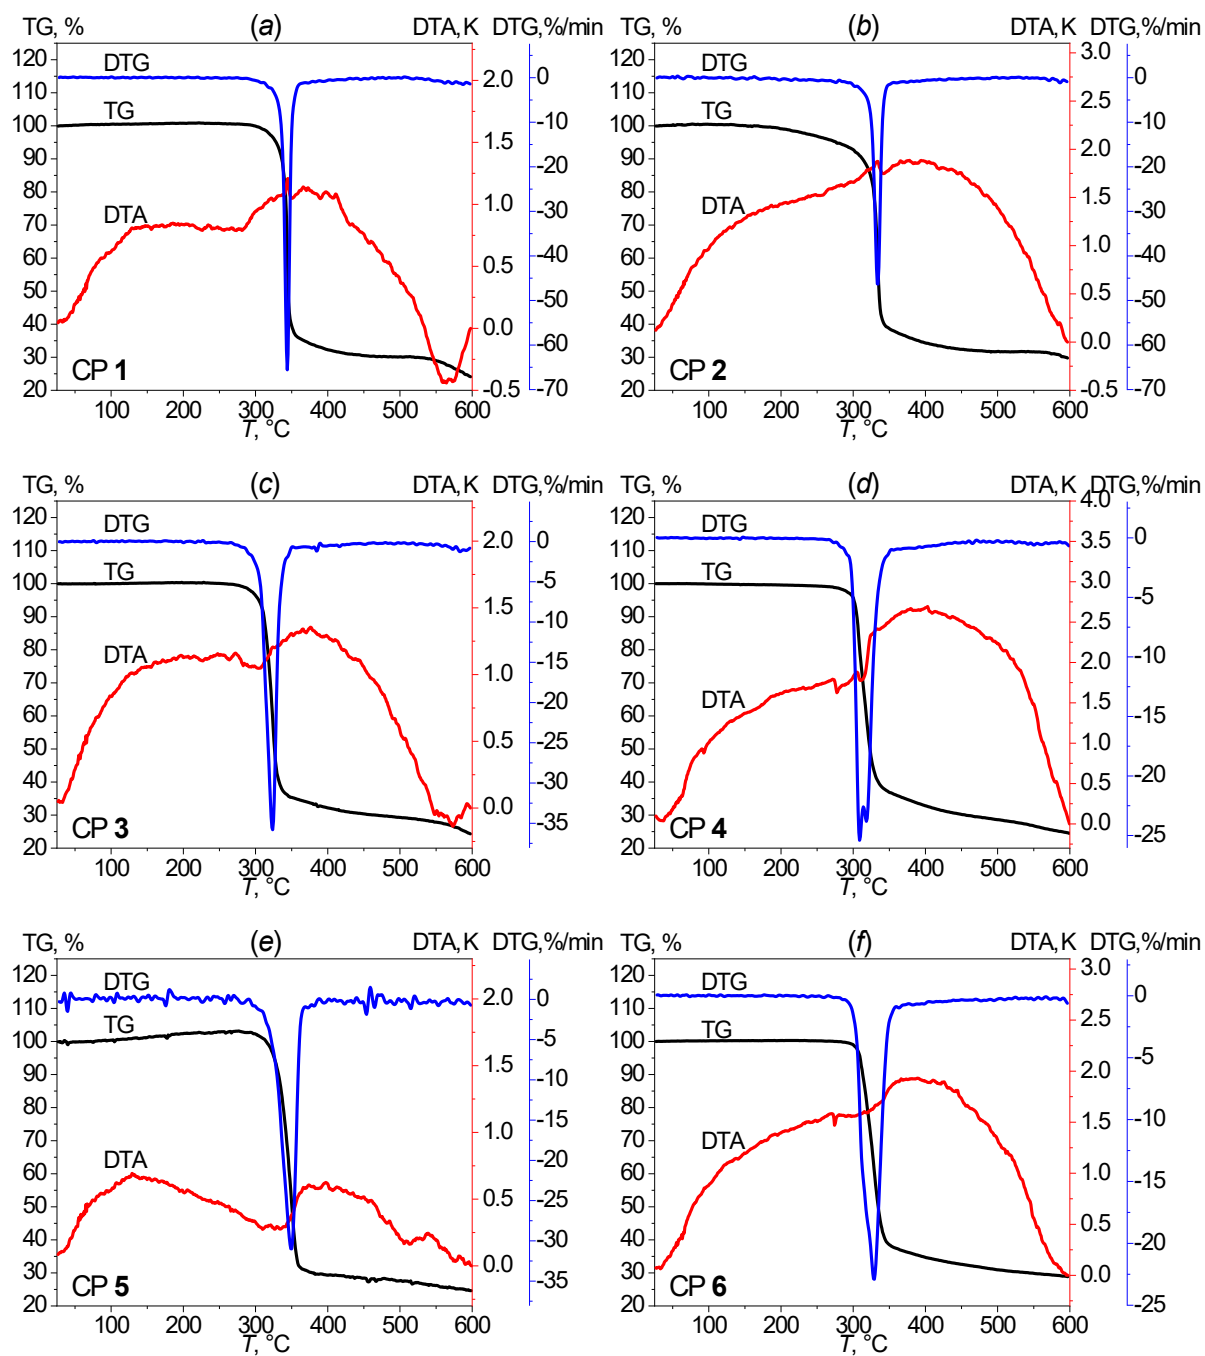

**Figure S7.** TG, DTA, and DTG of CPs **1** (a), **2** (b), **3** (c), **4** (d), **5** (e), and **6** (f).

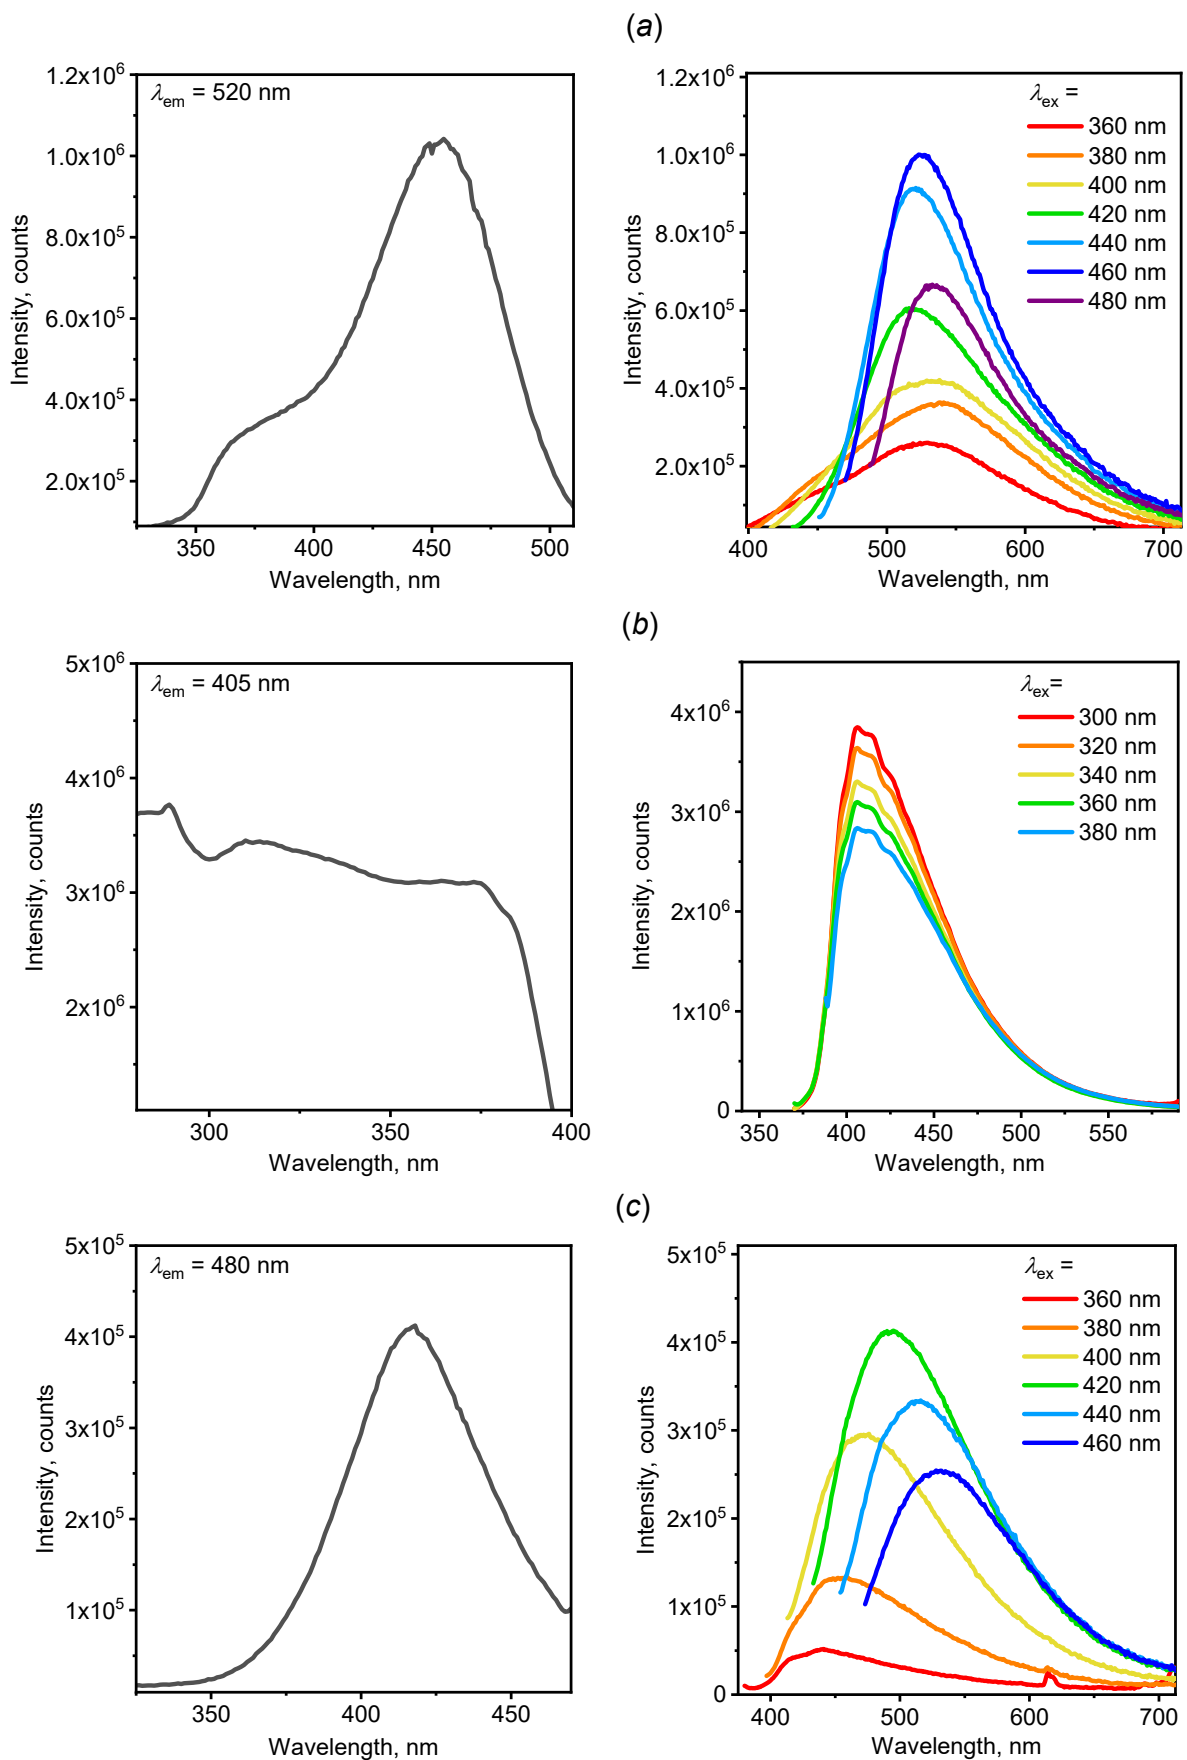

**Figure S8.** Excitation (left) and emission (right) spectra of  $L^1$  (a),  $L^2$  (b), and  $L^3$  (c) in the solid state at 300 K.

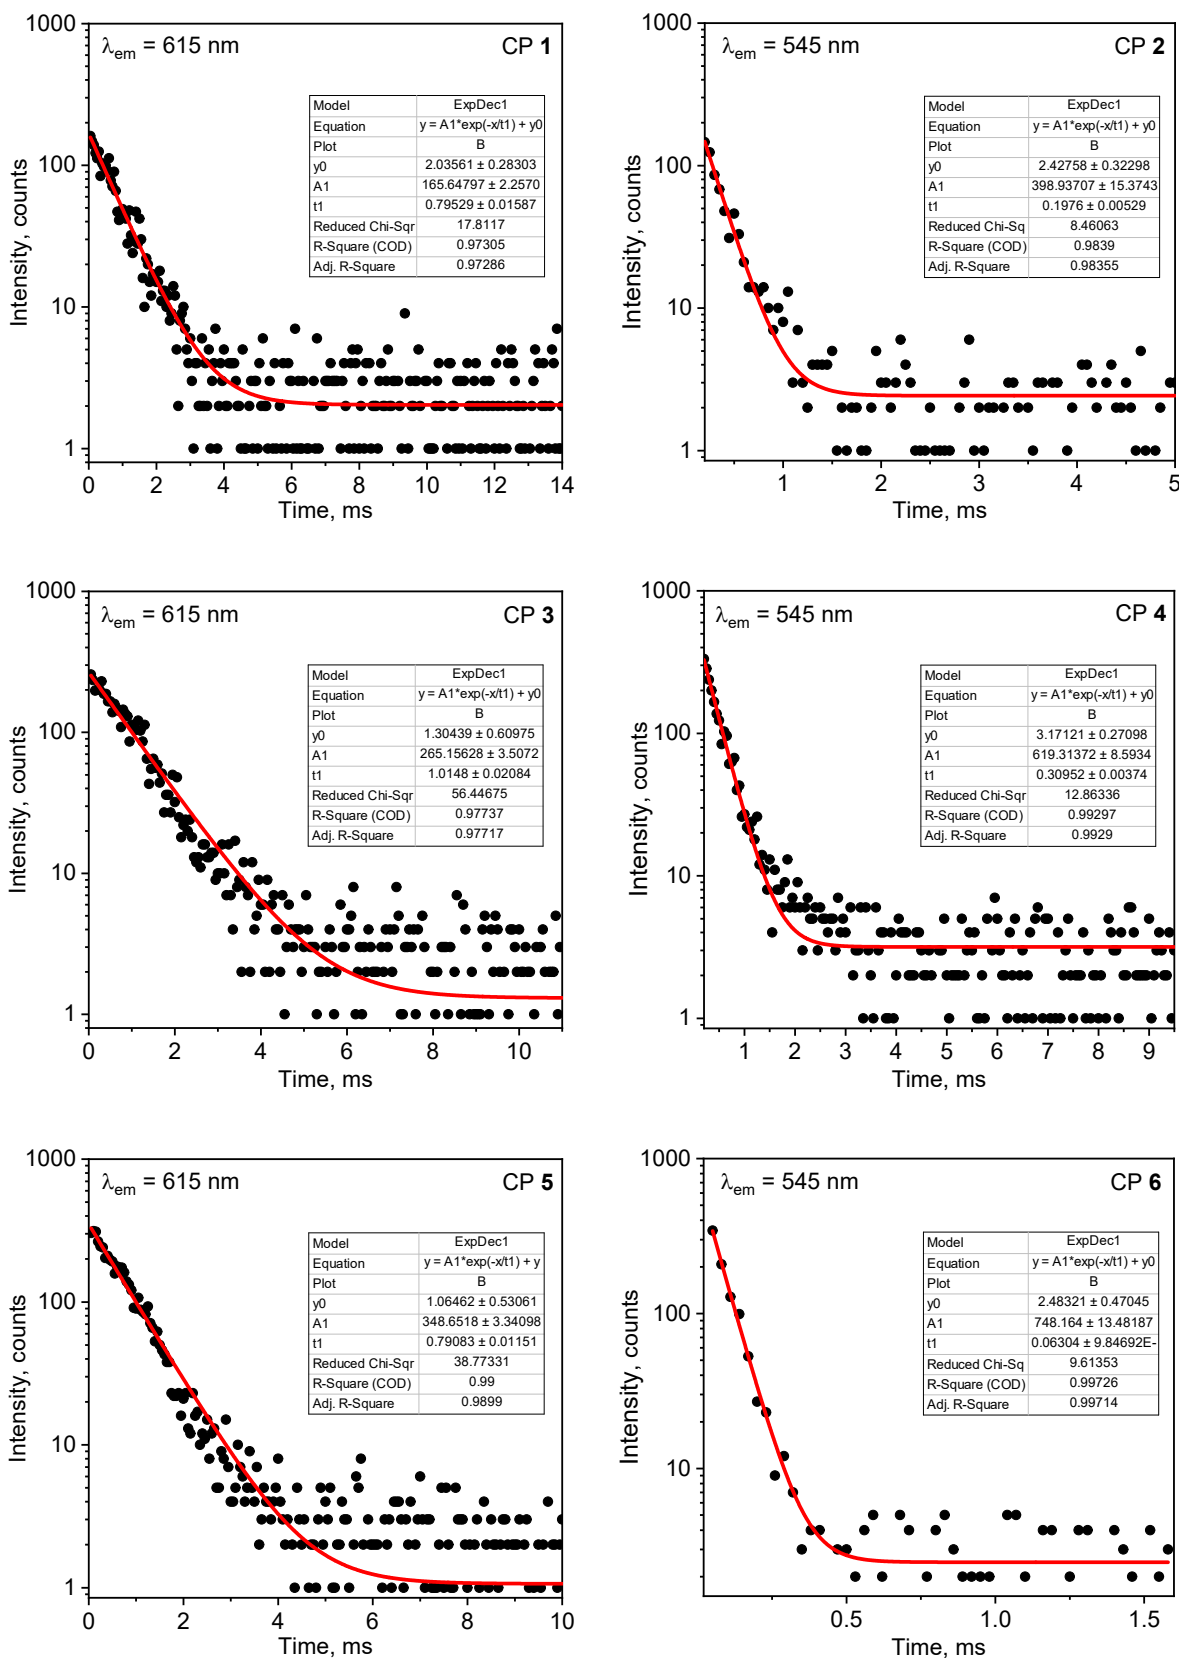

**Figure S9.** Kinetics of photoluminescence decay of CPs 1–6 in the solid state at 300 K ( $\lambda_{ex} = 350$  nm).

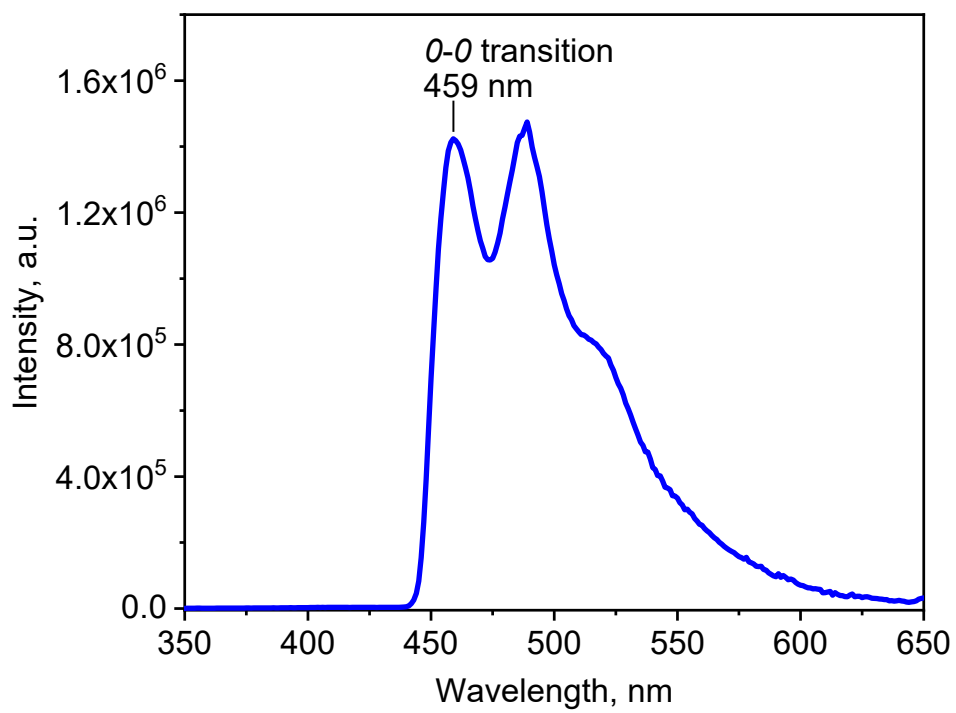

**Figure S10.** Solid-state emission spectrum of [Gd(hfac)<sub>3</sub>(H<sub>2</sub>O)<sub>2</sub>] at 77 K ( $\lambda_{\text{ex}} = 338$  nm).
